# Supplementary material
Source: PubMed Central journal article supplement (PMC3165447)
Supplement: supp_10_8_1071__1.pdf [file supp_10_8_1071__1.pdf]

**Supplemental table S1.** Tryptic peptide counts of all secretory medium proteins identified by QTOF in YNB-S, pH 7.4 at 37°C after 18 hours

| Name                    | Residues                   | Peptide                               | Protein length | Coverage % | R1 <sup>a</sup> | R2             | R3 | R4 | R5 |
|-------------------------|----------------------------|---------------------------------------|----------------|------------|-----------------|----------------|----|----|----|
| Als family <sup>b</sup> | 237-254                    | GLNDWNYPVSESEFSYTK                    |                |            | nd              | 1 <sup>c</sup> | nd | nd | 2  |
| Als3 <sup>d</sup>       | 77-92                      | FTTSQTSVDLTAHGVK                      | 1156 aa        | 2          | nd              | nd             | nd | 1  | nd |
|                         | 306-311                    | APFTLR                                |                |            | nd              | 2              | nd | 2  | nd |
| Bgl2                    | 19-29                      | MGDLAFNLGVK                           | 308 aa         | 9          | nd              | nd             | 1  | 1  | nd |
|                         | 106-112                    | ISVSTIK                               |                |            | 2               | 1              | 2  | 2  | 2  |
|                         | 124-134                    | EDLTASELASK                           |                |            | 1               | 1              | nd | nd | nd |
|                         | 289-297                    | HWGVWQSDK                             |                |            | 1               | nd             | nd | nd | nd |
| Cht2 <sup>d</sup>       | 99-121                     | TVLLSLGGGVGDYGFSDVASATK               | 583 aa         | 11         | nd              | nd             | nd | 2  | nd |
|                         | 178-200                    | NYFLSAAPQCPYPDASLGDLSSK               |                |            | nd              | nd             | 1  | nd | nd |
|                         | 240-258                    | LFVGVPAATSNIAGYVDTSK                  |                |            | nd              | nd             | nd | nd | 1  |
| Cht3                    | 21-39                      | SNSNVAVYWGQNSGGGQQR                   | 567 aa         | 20         | 1               | 3              | 3  | nd | 3  |
|                         | 100-121                    | TILLSLGGAAAGSYSGFSDATAK               |                |            | 3               | 1              | 1  | 1  | 1  |
|                         | 122-135                    | QFAHTLWDLFGNSK                        |                |            | 2               | nd             | 3  | 3  | 1  |
|                         | 182-203                    | NYYLGAAPQCPYPDASVGPLLK                |                |            | 2               | 1              | 3  | nd | 3  |
|                         | 246-255                    | LFVGVPAASSR                           |                |            | 2               | nd             | nd | nd | nd |
|                         | 256-279                    | AAGSGYNDPSAVSQYLTSIDLNSK              |                |            | nd              | 1              | 1  | nd | 2  |
| Coi1                    | 20-27                      | FNLLHDDK (n-term.)                    | 191 aa         | 34         | nd              | nd             | nd | nd | 2  |
|                         | 28-43                      | GFAILPPTNIVLDHLK                      |                |            | 3               | 1              | 1  | nd | nd |
|                         | 49-61                      | AVTTHYDVLNTIK                         |                |            | 2               | 1              | 3  | nd | 3  |
|                         | 103-110                    | TIEDSSLK                              |                |            | nd              | nd             | nd | 3  | nd |
|                         | 160-171                    | LKDMDDVPAQVR                          |                |            | 1               | 2              | 3  | 2  | 3  |
|                         | 182-191                    | AEVVGACAK (C-term)                    |                |            | 1               | 1              | nd | nd | 3  |
| Crh11 <sup>d</sup>      | 29-45                      | SSDCSPVPALGSSFLEK                     | 453 aa         | 6          | nd              | 1              | nd | nd | nd |
|                         | 77-84 [78-84] <sup>f</sup> | FDNPSFK [RFDNPSFK] <sup>f</sup>       |                |            | nd              | 1              | nd | nd | nd |
| Dag7                    | 185-198 [185-199]          | SVGNNPNHNPLCNK [SVGNNPNHNPLCNKK]      | 251 aa         | 17         | nd              | 3              | nd | nd | nd |
|                         | 208-216                    | SVDVTVVDR                             |                |            | 1               | 2              | 2  | nd | nd |
|                         | 217-234                    | CEGCAYNDLDFSPAADFCK                   |                |            | nd              | nd             | 1  | nd | nd |
| Ecm33 <sup>d</sup>      | 171-202                    | VFNVNNNDNIDTIDSLQEVTDIDISYNAEK        | 423 aa         | 17         | nd              | nd             | nd | 1  | nd |
|                         | 246-262                    | VELAELTSIGNSLTINK                     |                |            | nd              | 2              | nd | nd | nd |
|                         | 276-290                    | TIGGALQISDNSELR                       |                |            | 1               | nd             | 1  | nd | 3  |
|                         | 322-329                    | VSGGFILK                              |                |            | nd              | nd             | 1  | nd | 1  |
| Eng1                    | 430-442                    | AIDTNAPPTVFAR                         | 1145 aa        | 12         | nd              | nd             | nd | nd | 2  |
|                         | 703-710                    | FSYTTAGK                              |                |            | 1               | nd             | nd | 2  | 3  |
|                         | 711-746                    | SSSNNPIVFALPHHMSLTGSALDALTGITVTSTTK   |                |            | nd              | nd             | nd | 1  | nd |
|                         | 798-807                    | ELAANIAATVK                           |                |            | nd              | nd             | nd | 1  | 1  |
|                         | 808-817                    | NMNSNYFSGK                            |                |            | nd              | nd             | nd | nd | 1  |
|                         | 858-867                    | QYYPLMYDTK                            |                |            | nd              | nd             | nd | nd | 1  |
|                         | 914-923                    | LGGTWAQSNK                            |                |            | nd              | nd             | nd | nd | 2  |
|                         | 924-931                    | DWVNSLVR                              |                |            | 1               | nd             | nd | nd | nd |
|                         | 1030-1038                  | VSGIFFENK                             |                |            | nd              | nd             | nd | nd | 2  |
|                         | 1082-1100                  | DQIAGFIDNVDSGWTGILR                   |                |            | nd              | nd             | nd | nd | 1  |
|                         | Fgr41 <sup>d</sup>         | 30-36                                 | GNVVVVK        | 250 aa     | 3               | nd             | nd | 1  | nd |
| Gca1                    | 108-132                    | LVNHIEPTDLTDVFLPEELVVKPK              | 946 aa         | 3          | nd              | nd             | nd | nd | 2  |
| Hex1                    | 363-378                    | LTMWDDVLLSDVSADK                      | 562 aa         | 3          | 1               | nd             | nd | nd | nd |
| Mp65                    | 128-141                    | GITYSPYSDNGGCK                        | 378 aa         | 30         | 3               | 1              | 3  | nd | 3  |
|                         | 142-160                    | SESQIASEIAQLSGFDVIR                   |                |            | 2               | nd             | 3  | nd | nd |
|                         | 161-174                    | LYGVDCDQVSAVLK                        |                |            | 1               | 1              | 2  | nd | 3  |
|                         | 234-240 [234-241]          | AYVDEGR [AYVDEGRK]                    |                |            | 3               | nd             | 3  | 3  | 3  |
|                         | 302-309                    | VWTACSGK                              |                |            | 3               | nd             | 3  | nd | 3  |
|                         | 311-322 [311-333]          | NVLITETGWPSK [NVLITETGWPSKGSNGVAVPSK] |                |            | nd              | nd             | 3  | 3  | 1  |
|                         | 334-344                    | SNQQAASSIK                            |                |            | 2               | nd             | 2  | 2  | 2  |
|                         | 363-371 [363-378]          | ADGPYNAEK [ADGPYNAEKYGIYSN] (C-term)  |                |            | 3               | 2              | nd | 3  | nd |
| Msb2                    | 1212-1219                  | SLQNVSVR                              | 1409 aa        | 5          | nd              | nd             | 1  | 2  | 3  |
|                         | 1223-1237                  | ALGSFITTPGSAIYR                       |                |            | nd              | nd             | nd | 1  | 1  |
|                         | 1238-1253                  | NPDSVLQALASLIDSR                      |                |            | nd              | nd             | nd | 1  | nd |
|                         | 1254-1290                  | IPLTGLVTDDQQVSGSSSDSNPSTNSYGSMDIVSNTK |                |            | nd              | nd             | nd | 1  | nd |

|                    |                   |                                     |        |    |    |    |    |    |    |
|--------------------|-------------------|-------------------------------------|--------|----|----|----|----|----|----|
| Pga4 <sup>d</sup>  | 99-116            | AGIYVILDVNTPHSSITR                  | 451 aa | 4  | nd | nd | nd | 2  | 2  |
| Pga45 <sup>d</sup> | 86-98             | DANTEQTIEGILK                       | 462 aa | 6  | 1  | nd | nd | nd | nd |
|                    | 351-364           | YSGALSQILQDLEK                      |        |    | nd | 1  | nd | nd | nd |
| Phr1 <sup>d</sup>  | 438-452           | LSYVLNQYYLDQDKK                     | 548 aa | 3  | nd | nd | nd | 1  | nd |
| Pir1               | 249-266           | ACSSANNLEMTLHDSVLK                  | 346 aa | 5  | 3  | nd | 1  | nd | 2  |
| Pra1               | 152-165           | YLSQLCSGGYTVSK                      | 299 aa | 5  | nd | 1  | nd | nd | nd |
| Rbe1               | 149-169           | LAEYAQDYANTGFDCSNLNLK               | 271 aa | 14 | 1  | 1  | nd | nd | 1  |
|                    | 221-229           | STTQVGCAK                           |        |    | 1  | 1  | nd | nd | nd |
|                    | 230-237           | MMCSTAWR                            |        |    | nd | nd | nd | nd | 3  |
| Rbt1               | 199-220           | VNAVSNIAIGTFDASALFNAQVK             | 721 aa | 3  | nd | nd | nd | nd | 1  |
| Rbt4               | 208-221           | DTQFAQQILDAHNK                      | 358 aa | 12 | nd | nd | nd | 2  | nd |
|                    | 286-307           | DGLSYSYGSSSVYNHFTQVVWK              |        |    | nd | nd | nd | 1  | nd |
|                    | 312-317           | LGCAVK                              |        |    | nd | 1  | nd | nd | nd |
| Rbt5 <sup>d</sup>  | 61-92             | QSTSSTPCPYWDTGCLCVMPPQFAGAVGNCVAK   | 241 aa | 13 | 2  | nd | 1  | nd | nd |
| Sap5               | 334-347           | TSGTIDFQFGNNLK                      | 418 aa | 3  | nd | 1  | nd | nd | nd |
| Scw11              | 267-275           | SDIQLINSK                           | 506 aa | 21 | 2  | nd | 2  | 1  | 2  |
|                    | 282-298           | SYGTDCGSLTTVLETCR                   |        |    | 2  | nd | 3  | nd | nd |
|                    | 366-376           | SQLQSAGYNGK                         |        |    | nd | 1  | nd | 1  | nd |
|                    | 377-388           | VTSEPPATYLK                         |        |    | 3  | 2  | 3  | 1  | 3  |
|                    | 417-436           | DAGSYIVHQQQVAEICGGK                 |        |    | 3  | 1  | 2  | nd | 3  |
|                    | 437-448           | SVLITETGYPSK                        |        |    | 2  | nd | 2  | 2  | 3  |
|                    | 449-471           | GSTLGVNVSPENQEIAISSIIK              |        |    | 3  | nd | 3  | nd | 3  |
| Sim1               | 162-176           | DGYYSYACQAGMSK                      | 372 aa | 28 | nd | nd | 2  | nd | nd |
|                    | 177-196           | TQWPSEQPSNGMSIGGLYCK                |        |    | nd | nd | 1  | nd | nd |
|                    | 203-216           | SNTDNDYLCEWGSK                      |        |    | 3  | 1  | 3  | nd | 3  |
|                    | 217-232           | DVNFVSEISEDVAICR                    |        |    | 2  | nd | nd | nd | 1  |
|                    | 233-252           | TDYPGSENMNIPTLLSAGGK                |        |    | 3  | nd | 3  | 1  | nd |
|                    | 326-333           | DKPNYNNIK                           |        |    | 1  | 2  | 3  | nd | 3  |
|                    | 334-344           | IVGDDVNGDCK                         |        |    | nd | 3  | nd | nd | nd |
| Sod4 <sup>d</sup>  | 105-117           | TPAALELGDLGR                        | 232 aa | 6  | 1  | nd | nd | nd | nd |
| Ssr1 <sup>d</sup>  | 41-54             | CSGLNDLSCICTTK                      | 234 aa | 13 | nd | 1  | 2  | nd | 1  |
|                    | 64-79             | EICPNGDADTAISAFK                    |        |    | nd | 2  | nd | nd | nd |
| Sun41              | 204-218           | EGSYYSYACQSGMSK                     | 418 aa | 25 | 2  | 3  | 3  | nd | 2  |
|                    | 219-238           | TQWPEDQPSNGVSIIGLLCK                |        |    | 3  | nd | 3  | nd | 3  |
|                    | 249-258 [249-259] | SNYLCEWGVK [SNYLCEWGVKK]            |        |    | 1  | nd | 2  | nd | nd |
|                    | 259-264 [258-264] | ANVVNK [KANVVNK]                    |        |    | 1  | nd | nd | nd | nd |
|                    | 266-274           | LSETVAICR                           |        |    | 3  | 3  | 3  | nd | 3  |
|                    | 275-309           | TDYPGTENMVIPTVVGGGSTSVITVVDQSTYYTWR |        |    | 1  | nd | nd | nd | nd |
|                    | 368-373           | DSLNFK                              |        |    | 3  | nd | 3  | 1  | 3  |
| Tos1               | 22-36             | GCSFEGGNYCSETK                      | 468 aa | 34 | nd | nd | 1  | nd | nd |
|                    | 42-61             | GIGFSGSYMVDVTNMDENTGK               |        |    | 2  | 3  | nd | 3  | 1  |
|                    | 231-259           | DSYYTPGSTDCVFLNYHGGSGGVWSAK         |        |    | 3  | 2  | 1  | nd | 1  |
|                    | 260-287           | FGNSLSYANADNSGGSSTPVPLEETIK         |        |    | 2  | 1  | nd | nd | 1  |
|                    | 288-299           | SGEEYIIFSGSK                        |        |    | 2  | nd | nd | nd | 1  |
|                    | 300-310           | CGSSDCGYR                           |        |    | 3  | nd | 3  | nd | 3  |
|                    | 311-320 [310-320] | GTVAYHGFK [KGTVAYHGFK]              |        |    | 3  | nd | 3  | 3  | 3  |
|                    | 358-370           | TLQYGEATCSCWK                       |        |    | nd | 1  | nd | nd | nd |
|                    | 371-388           | TGCGELDLFEVLSGSNK                   |        |    | 3  | nd | 1  | 1  | 1  |
| Utr2 <sup>d</sup>  | 75-85             | MSTFQESFDSK                         | 470 aa | 14 | nd | 1  | nd | nd | nd |
|                    | 245-253           | YDYPQTPSR                           |        |    | 1  | nd | 3  | 3  | nd |
|                    | 246-268           | IQFSLWPGDSSNAK                      |        |    | nd | 1  | nd | nd | 2  |
|                    | 288-296           | YGYYYAHIK                           |        |    | nd | nd | nd | nd | 2  |
|                    | 297-310           | EIYATAIDIPNDVK                      |        |    | 1  | nd | nd | nd | 3  |
| Xog1               | 39-54             | GGGHNVAWDYDNNVIR                    | 438 aa | 40 | 3  | 1  | 3  | 3  | 2  |

|                   |                              |                   |        |    |    |    |    |    |   |
|-------------------|------------------------------|-------------------|--------|----|----|----|----|----|---|
| 108-119           | HWSTWITEQDFK                 |                   |        | nd | nd | 1  | 1  | nd |   |
| 120-130           | QISNLGLNFVR                  |                   |        | 3  | nd | 1  | nd | 1  |   |
| 168-189           | VWIDLHGAPGSQNGFDNSGLR        |                   |        | 1  | 2  | nd | 3  | 1  |   |
| 243-253           | QFFLDGYNSLR                  |                   |        | nd | nd | nd | 1  | nd |   |
| 304-320           | NINDHISVACNWGWDAK            |                   |        | 2  | nd | 1  | nd | 3  |   |
| 322-340           | ESHWNVAGEWSAALTDCAK          |                   |        | 1  | nd | 1  | nd | 1  |   |
| 341-347           | WLNQVNR                      |                   |        | 3  | nd | nd | nd | 3  |   |
| 351-378           | YEGAYDNAPYIGSCQPLLDISQWSDEHK |                   |        | nd | nd | 1  | nd | nd |   |
| 405-429           | TENAPEWSFQTLTYNGLFPPVTDR     |                   |        | nd | nd | 3  | nd | nd |   |
| 430-438           | QFPNQCGFH                    |                   |        | 1  | 1  | 2  | nd | nd |   |
| Ywp1 <sup>d</sup> | 87-93                        | VINVPAR           | 533 aa | 7  | 3  | 2  | nd | nd | 2 |
|                   | 94-110                       | NLYGAGAVPFFQVHLEK |        |    | 3  | nd | 1  | 1  | 1 |
|                   | 329-339                      | VITVVACDEHK       |        |    | nd | 3  | 1  | nd | 1 |

nd = not detected

average protein coverage % 13

<sup>a</sup> Independent biological replicate

<sup>b</sup> Peptide common to at least two members of the protein family

<sup>c</sup> Number of peptides per biological replicate found in three technical replicates

<sup>d</sup> GPI-wall protein

<sup>e</sup> Residues in parentheses are from the miscleaved peptide

<sup>f</sup> The sequence of the miscleaved peptide is in parentheses

**Proteins with predicted intracellular localization**

| Name              | Residues | Peptide                  | R1 <sup>a</sup> | R2 | R3 | R4 | R5 |
|-------------------|----------|--------------------------|-----------------|----|----|----|----|
| Ald5              | 140-157  | ILGSQINTGNTHFNVTQR       | nd              | 2  | nd | nd | nd |
|                   | 179-192  | LGPVLATGSTTVLK           | nd              | 3  | nd | nd | nd |
|                   | 362-373  | SQGATVVTGGAR             | nd              | 1  | nd | nd | nd |
| Cdc54             | 862-868  | FNDLSVK                  | 1               | nd | nd | nd | nd |
| Cyp1              | 124-138  | HVVFGEVTDGLDIVK          | nd              | 1  | nd | nd | nd |
| Cyp5 <sup>e</sup> | 156-171  | WLDGAHVVFGEVLDGK         | 1               | nd | nd | nd | nd |
| Eno1              | 34-51    | SIVPSGASTGVHEALELR       | nd              | nd | nd | nd | 1  |
|                   | 225-236  | EALDLIMDAIDK             | nd              | nd | 2  | nd | nd |
|                   | 260-265  | YDLDFK                   | nd              | 1  | nd | nd | nd |
|                   | 319-333  | IQIVGDDLTVTNPTR          | nd              | nd | 3  | nd | nd |
|                   | 341-349  | KAANALLK                 | nd              | 1  | nd | nd | nd |
| Hsp90             | 90-101   | ADLVNNLGTIAK             | nd              | 1  | nd | nd | nd |
| Met15             | 311-332  | NPNVESVSYLGLPSHESHELSK   | nd              | 1  | nd | nd | nd |
| Mnt1 <sup>e</sup> | 201-210  | IYGHSESYR                | nd              | nd | nd | 1  | nd |
|                   | 259-270  | DYAFTISLPEYK             | nd              | nd | nd | 1  | nd |
| Pdi1 <sup>e</sup> | 134-144  | EAAGIADYMIK              | nd              | nd | nd | 1  | nd |
|                   | 222-231  | KPSYLVVQPK               | nd              | nd | 1  | 1  | nd |
|                   | 321-345  | HAEVINMDPEVVPLFAIHHSNDKK | nd              | nd | nd | 1  | nd |
|                   | 498-507  | ELDTLIEFIK               | nd              | nd | 1  | nd | nd |
| Pup3              | 50-65    | TFLGLTGLATDVISLK         | nd              | 1  | nd | nd | nd |
|                   | 199-204  | RVLKTR                   | nd              | 1  | nd | nd | nd |
| Tdh3              | 234-247  | VPTTDVSVDLTVR            | nd              | 1  | nd | nd | nd |
| Tef1              | 254-264  | IGGIGTVPVGR              | nd              | 1  | nd | nd | nd |
|                   | 272-288  | AGMVVTFAPAGVTTEVK        | nd              | 1  | nd | nd | nd |
| Ubi3 <sup>e</sup> | 49-53    | TLTGK                    | nd              | 1  | nd | nd | nd |
|                   | 106-114  | ESTLHLVLR                | nd              | 2  | nd | nd | nd |

<sup>e</sup> Predicted to be ER- or Golgi-associated proteins
