# Supplementary material
Source: PubMed Central journal article supplement (PMC3165447)
Supplement: supp_10_8_1071__2.pdf [file supp_10_8_1071__2.pdf]

**Supplemental table S2.** Tryptic peptide counts of all secretory medium proteins identified by QTOF in YNB-S, pH 7.4 + 0.5 mg/L fluconazole at 37°C after 18 hours

| Name                    | Residues                   | Peptide                                  | Protein length | Coverage % | R1 <sup>a</sup> | R2 | R3 | R4             | R5 |
|-------------------------|----------------------------|------------------------------------------|----------------|------------|-----------------|----|----|----------------|----|
| Als family <sup>b</sup> | 237-254                    | GLNDWNYPVSSSESFSYTK                      |                |            | nd              | nd | nd | 1 <sup>c</sup> | nd |
| Bgl2                    | 19-29                      | MGDLAFNLGVK                              | 308 aa         | 40         | nd              | 3  | 2  | 1              | nd |
|                         | 57-96                      | TYAVSDCNTLQNLGPAAEAEGFQIQLGIWPNDDAHFEAEK |                |            | nd              | nd | nd | nd             | 1  |
|                         | 97-105                     | EALQNYLPK                                |                |            | 1               | 2  | nd | nd             | nd |
|                         | 106-112                    | ISVSTIK                                  |                |            | 3               | 1  | 3  | 1              | 3  |
|                         | 124-134                    | EDLTASELASK                              |                |            | 3               | nd | nd | nd             | nd |
|                         | 218-254                    | GSTDIEFWVGETGWPTDGSSYGDSVPSVENAADQWQK    |                |            | nd              | nd | nd | nd             | 1  |
|                         | 289-297                    | HWGVWQSDK                                |                |            | nd              | nd | 1  | nd             | 1  |
| Cfl2                    | 60-77                      | CYCNQDPGFGTISDCLVR                       | 738 aa         | 2          | nd              | nd | nd | 1              | nd |
| Cht1                    | 230 - 253                  | LYLGLPGSSSSAGSGFVGLSTVQR                 | 462 aa         | 5          | nd              | nd | nd | nd             | 2  |
| Cht2 <sup>d</sup>       | 99-121                     | TVLLSLGGGVGDYGFSDVASATK                  | 583 aa         | 4          | nd              | nd | nd | nd             | 1  |
| Cht3                    | 21-39                      | SNSNAVYWGQNSGGSQQR                       | 567 aa         | 20         | 3               | nd | nd | 1              | nd |
|                         | 100-121                    | TILLSLGGAAAGSYSGFSDATAK                  |                |            | nd              | nd | 2  | 1              | nd |
|                         | 122-135                    | QFAHTLWDLFGNSK                           |                |            | 1               | 1  | 2  | nd             | 1  |
|                         | 182-203                    | NYYLGAAPQCPYPDASVGPLLK                   |                |            | 2               | 2  | 2  | 3              | 3  |
|                         | 246-255                    | LFVGVPASSR                               |                |            | nd              | nd | nd | nd             | 1  |
|                         | 256-279                    | AAGSGYNDPSAVSQYLTSIDLNSK                 |                |            | nd              | 1  | 1  | 1              | nd |
| Coi1                    | 28-43                      | GFAILPPTNIVLDHLK                         | 191 aa         | 31         | nd              | 2  | nd | nd             | nd |
|                         | 49-61                      | AVTHYDVLNTIK                             |                |            | 1               | 3  | 2  | 3              | 2  |
|                         | 144-152                    | YSCLLDVMK                                |                |            | nd              | nd | 1  | nd             | nd |
|                         | 160-171                    | LKDMDDVPAQVR                             |                |            | 3               | 3  | 3  | nd             | 3  |
|                         | 182-191                    | AEVVGACAK (C-term)                       |                |            | nd              | 3  | nd | nd             | nd |
| Crh11 <sup>e</sup>      | 29-45                      | SSDCSPVPALGSSFLEK                        | 453 aa         | 15         | 1               | 2  | nd | 1              | nd |
|                         | 77-84 [78-84] <sup>c</sup> | FDNPSFK [RFDNPSFK] <sup>f</sup>          |                |            | nd              | nd | nd | 1              | nd |
|                         | 148-158                    | GGYHDIANPLK                              |                |            | nd              | nd | nd | nd             | 1  |
|                         | 159-169                    | DYHTYVIDWTK                              |                |            | nd              | 1  | nd | nd             | nd |
|                         | 170-182                    | DAVTWSVDGSVIR                            |                |            | 1               | 1  | nd | nd             | nd |
|                         | 271-279                    | YDQAQDDIK                                |                |            | nd              | nd | nd | nd             | 3  |
| Dag7                    | 185-198 [185-199]          | SVGNNPNHNPLCNK [SVGNNPNHNPLCNKK]         | 251 aa         | 26         | 3               | 3  | nd | nd             | 2  |
|                         | 202-207                    | AFYEGK                                   |                |            | nd              | nd | nd | 1              | 2  |
|                         | 208-216                    | SVDVTVVDR                                |                |            | 2               | 3  | 3  | nd             | 1  |
|                         | 217-234                    | CEGCAYNDLDFSPAADFCK                      |                |            | 2               | 2  | nd | nd             | 1  |
|                         | 235-242                    | LADESLGR                                 |                |            | nd              | nd | nd | 1              | nd |
|                         | 243-251                    | IDITWEWLN                                |                |            | nd              | nd | nd | nd             | 1  |
| Ece1                    | 177-193                    | LISNVFDGVSETVQQAQK                       | 271 aa         | 6          | nd              | 1  | nd | nd             | nd |
| Ecm33 <sup>d</sup>      | 139-168                    | TGLTAGITSAESVVISDTGLSSLTGINVFK           | 423 aa         | 16         | 3               | 1  | nd | nd             | 1  |
|                         | 276-290                    | TIGGALQISDENSELR                         |                |            | nd              | 3  | 3  | nd             | 1  |
|                         | 322-329                    | VSGGFILK                                 |                |            | 1               | 1  | 3  | nd             | nd |
|                         | 342-349                    | LNTNGDIK                                 |                |            | nd              | nd | nd | 2              | 1  |
|                         | 335-340                    | FQCEDR                                   |                |            | nd              | nd | nd | 2              | 3  |
| Eng1                    | 914-923                    | LGGTWAQSNK                               | 1145 aa        | 3          | 1               | nd | nd | nd             | nd |
|                         | 1082-1100                  | DQIAGFIDNVDSGWTGILR                      |                |            | 1               | nd | nd | nd             | nd |
| Gca1                    | 108-132                    | LNVHIEPTDLTDVFLPEELVVKPK                 | 946 aa         | 7          | nd              | 3  | nd | nd             | nd |
|                         | 193-214                    | GHSITGLGESIHGSLNEPGVVK                   |                |            | nd              | 1  | nd | nd             | nd |
|                         | 685-704                    | NHNVLGAIPQEPYVWEAVMK                     |                |            | nd              | nd | 1  | nd             | nd |
| Mp65                    | 128-141                    | GITYSPYSDNGGCK                           | 378 aa         | 30         | 1               | 3  | 2  | 2              | 2  |
|                         | 161-174                    | LYGVDCDQVSAVLK                           |                |            | 2               | 1  | 1  | nd             | nd |
|                         | 234-240 [234-241]          | AYVDEGR [AYVDEGRK]                       |                |            | 3               | 3  | 3  | 3              | 3  |
|                         | 302-309                    | VWTACSGK                                 |                |            | 3               | 3  | 3  | nd             | 2  |
|                         | 311-322 [311-333]          | NVLITETGWPSK [NVLITETGWPSKGSNGVAVPSK]    |                |            | nd              | 1  | nd | nd             | nd |
|                         | 323-333                    | GDSNGLAVPSK                              |                |            | nd              | nd | nd | 1              | nd |
|                         | 334-344                    | SNQQAASSIK                               |                |            | nd              | 3  | 3  | 1              | 2  |
|                         | 345-362                    | SSCGASALLFTAFNDLWK                       |                |            | nd              | nd | nd | nd             | nd |
|                         | 363-371 [363-378]          | ADGPYNAEK [ADGPYNAEKYGIYSN] (C-term)     |                |            | nd              | nd | 1  | 1              | 2  |
| Msb2                    | 1223-1238                  | ALGSFITTPGSAIYR                          | 1409 aa        | 2          | 1               | nd | 2  | nd             | nd |
|                         | 1239-1253                  | NPDSVLQALASLIDSR                         |                |            | nd              | nd | nd | nd             | 1  |
| Op4                     | 93-108                     | LTTDPSISSLSNLIK                          | 403 aa         | 9          | nd              | 1  | nd | nd             | nd |
|                         | 261-281                    | QSGLDWQALVYIQNNAGSWIK                    |                |            | nd              | 2  | nd | nd             | nd |
| Orf19.1239              | 67 - 79                    | ENQIVTDVLTAIK                            | 328 aa         | 15         | nd              | 1  | nd | nd             | nd |
|                         | 80 - 89                    | NTNLSPGIHK                               |                |            | nd              | 3  | nd | nd             | nd |
|                         | 135 - 148                  | DLINDCAFYAYIYK                           |                |            | nd              | 1  | nd | nd             | nd |
|                         | 274 - 286                  | SVIVTALAAAFGK                            |                |            | nd              | 1  | nd | nd             | nd |
| Orf19.1765              | 158 - 174                  | LMELIQGQWSNEVGGVR                        | 418 aa         | 4          | nd              | nd | nd | 1              | nd |
| Orf19.1766              | 172 - 191                  | VDSNYIASISTVEAALSAVK                     | 401 aa         | 5          | nd              | 2  | nd | nd             | nd |
| Orf19.3499              | 28 - 42                    | TFGYPPPQYPEVTGK                          | 167 aa         | 15         | nd              | nd | nd | 2              | 3  |
|                         | 132 - 141                  | NIDDPYNYSK                               |                |            | nd              | nd | nd | 1              | nd |
| Orf19.6553              | 196 - 210                  | LFINELSQIHLGEK                           | 393 aa         | 4          | nd              | 1  | nd | nd             | nd |

|                    |                                                                                                                                                                                |                                                                                                                                                                                                                                                                                                                                              |        |    |                                                                                |                                                                                        |                                                                                   |                                                                                                  |                                        |
|--------------------|--------------------------------------------------------------------------------------------------------------------------------------------------------------------------------|----------------------------------------------------------------------------------------------------------------------------------------------------------------------------------------------------------------------------------------------------------------------------------------------------------------------------------------------|--------|----|--------------------------------------------------------------------------------|----------------------------------------------------------------------------------------|-----------------------------------------------------------------------------------|--------------------------------------------------------------------------------------------------|----------------------------------------|
| Pbr1               | 90-101                                                                                                                                                                         | TSYALTYSEDGK                                                                                                                                                                                                                                                                                                                                 | 175 aa | 7  | nd                                                                             | nd                                                                                     | nd                                                                                | 1                                                                                                | 1                                      |
| Pga4 <sup>d</sup>  | 42-65<br>99-116<br>302-315                                                                                                                                                     | GVDYQPGGSSELEDPLADTNVCER<br>AGIYVILDVNTPHSSITR<br>GDSVTTNDDFDNLK                                                                                                                                                                                                                                                                             | 451 aa | 12 | nd                                                                             | nd                                                                                     | nd                                                                                | 1                                                                                                | nd                                     |
| Pga7 <sup>o</sup>  | 14-27<br>52-94                                                                                                                                                                 | ADYGNFGTYPKVPK<br>FSTSNTPCPYWDTGCFVMPQWAGLVGQCVAQK                                                                                                                                                                                                                                                                                           | 219 aa | 26 | nd                                                                             | nd                                                                                     | nd                                                                                | 1                                                                                                | nd                                     |
| Pga46 <sup>d</sup> | 74-80<br>292-297                                                                                                                                                               | ESFIPRR<br>ELNKLK                                                                                                                                                                                                                                                                                                                            | 340 aa | 4  | nd                                                                             | nd                                                                                     | nd                                                                                | 2                                                                                                | nd                                     |
| Phr family         | 175-184/165-174                                                                                                                                                                | SNTDASAFVK                                                                                                                                                                                                                                                                                                                                   |        |    | nd                                                                             | 1                                                                                      | 2                                                                                 | nd                                                                                               | 2                                      |
| Phr1 <sup>o</sup>  | 21-35<br>49-70 [49-71]<br>99-113<br>114-135<br>136-146<br>175-184<br>201-215<br>231-244<br>245-253<br>254-260<br>280-291<br>367-385<br>386-423<br>424-435 [424-437]<br>438-452 | KFESSTPPVEVVGNK<br>GIAYQQDAAGSVSSGYDADPNR [GIAYQQDAAGSVSSGYDADPNRK]<br>VY AIDPKDHEECMK<br>IFSDAGIYIVADLSEPTVSINR<br>NNPEWNLDLK<br>SNTDASAFVK<br>QIPVGYSSNDDEEIR<br>ADDFGINMYEWCCK<br>STFETSGYK<br>DRTEEIK<br>LFQEIGTLYSK<br>AATNLPPPTDESYCDCISK<br>SLECVVADDVDKEDYGDLEFGVQVCGYIDCSAISADGSK<br>GEYGVASFCSK [GEYGVASFCSKDR]<br>LSYVLNQYLLDQDKK | 548 aa | 44 | 1<br>2<br>nd<br>1<br>1<br>3<br>1<br>nd<br>nd<br>nd<br>nd<br>1<br>2<br>nd<br>nd | nd<br>2<br>3<br>2<br>nd<br>2<br>nd<br>1<br>3<br>nd<br>nd<br>nd<br>nd<br>nd<br>nd<br>nd | 1<br>nd<br>3<br>2<br>1<br>1<br>nd<br>3<br>nd<br>2<br>1<br>nd<br>nd<br>3<br>2<br>1 | nd<br>1<br>2<br>nd<br>nd<br>nd<br>nd<br>nd<br>nd<br>nd<br>nd<br>nd<br>nd<br>nd<br>nd<br>nd<br>nd |                                        |
| Phr2 <sup>o</sup>  | 89-126<br>239-250<br>251-269<br>384-399                                                                                                                                        | VYALDTSQDHTECMQMLQDAGIYVIADLSQPDESINR<br>ASGYESATNDYK<br>NLGIPIFFSEYGCNEVRPR<br>VSDDDYSDLFSYICAK                                                                                                                                                                                                                                             | 544 aa | 16 | nd<br>nd<br>nd<br>nd                                                           | nd<br>nd<br>nd<br>nd                                                                   | nd<br>nd<br>2<br>1                                                                | nd<br>nd<br>nd<br>nd                                                                             | 1<br>3<br>nd<br>nd                     |
| Pir1               | 249-266                                                                                                                                                                        | ACSSANNLEMTLHDSVLK                                                                                                                                                                                                                                                                                                                           | 346 aa | 5  | 2                                                                              | 1                                                                                      | 3                                                                                 | nd                                                                                               | 1                                      |
| Pib3 <sup>d</sup>  | 216-244<br>295-308                                                                                                                                                             | ALSHOFFPGLDDGGDALTWSTLQDVDVFK<br>NYEMPPPIVVADGR                                                                                                                                                                                                                                                                                              | 632 aa | 7  | nd<br>nd                                                                       | nd<br>nd                                                                               | nd<br>nd                                                                          | nd<br>nd                                                                                         | 1<br>1                                 |
| Rbe1               | 136-148<br>149-169<br>221-229<br>230-237<br>238-347                                                                                                                            | ALHGVPAISWSNK<br>LAEYAQDYANTGFDCSNLNLK<br>STTQVCGAK<br>MMCSTAWR<br>QITVCEYLPR                                                                                                                                                                                                                                                                | 271 aa | 59 | 1<br>1<br>2<br>nd<br>nd                                                        | 2<br>nd<br>nd<br>nd<br>2                                                               | 1<br>1<br>nd<br>nd<br>nd                                                          | 1<br>nd<br>nd<br>nd<br>nd                                                                        | nd<br>1<br>nd<br>1<br>nd               |
| Rbt4               | 208-221<br>312-317<br>348-358                                                                                                                                                  | DTQFAQQILDAHAK<br>LGCAVK<br>SYMAENVLRPQ                                                                                                                                                                                                                                                                                                      | 358 aa | 9  | 2<br>1<br>nd                                                                   | 3<br>3<br>1                                                                            | nd<br>nd<br>1                                                                     | nd<br>nd<br>nd                                                                                   | nd<br>nd<br>nd                         |
| Rbt5 <sup>d</sup>  | 61-92                                                                                                                                                                          | QSTSSTPCPYWDTGCLCVMPPQFAGAVGNVCAK                                                                                                                                                                                                                                                                                                            | 241 aa | 13 | nd                                                                             | nd                                                                                     | 3                                                                                 | nd                                                                                               | nd                                     |
| Sap9 <sup>d</sup>  | 244-256<br>307-319<br>332-341                                                                                                                                                  | SLYSYLNTADAK<br>AGSILFGAIDHAK<br>TYSQSYPPVR                                                                                                                                                                                                                                                                                                  | 544 aa | 7  | nd<br>nd<br>1                                                                  | nd<br>nd<br>nd                                                                         | 1<br>1<br>1                                                                       | nd<br>nd<br>nd                                                                                   | nd<br>1<br>nd                          |
| Scw11              | 267-275<br>282-298<br>377-388<br>417-436<br>437-448<br>449-471                                                                                                                 | SDIQLNSK<br>SYGTDGCSLTTVLETCR<br>VTSEPPATYLYK<br>DAGSYIVHQQQVAEICGGK<br>SVLITETGYPSK<br>GSTLGVNVSPENQEIAISSIHK                                                                                                                                                                                                                               | 506 aa | 18 | nd<br>2<br>nd<br>3<br>2<br>1                                                   | 1<br>3<br>1<br>nd<br>2<br>nd                                                           | 3<br>3<br>1<br>2<br>1<br>1                                                        | nd<br>nd<br>2<br>1<br>1<br>nd                                                                    | nd<br>nd<br>nd<br>2<br>2<br>2          |
| Sim1               | 162-176<br>203-216<br>217-232<br>233-252<br>326-333                                                                                                                            | DGYCYACQAGMSK<br>SNTDNDYLCEWGSK<br>DVNFVSEISEDVAICR<br>TDYPGSENMNIPTLLSAGGK<br>DKPNYNNIK                                                                                                                                                                                                                                                     | 372 aa | 20 | nd<br>nd<br>1<br>1<br>3                                                        | 1<br>nd<br>3<br>2<br>3                                                                 | nd<br>1<br>nd<br>3<br>3                                                           | nd<br>nd<br>nd<br>2<br>nd                                                                        | nd<br>nd<br>nd<br>2<br>2               |
| Sod4 <sup>d</sup>  | 28-33 [26-33]<br>105-117                                                                                                                                                       | APLVAR [GKAPLVAR]<br>TPAALELGDLSSGR                                                                                                                                                                                                                                                                                                          | 232 aa | 9  | nd<br>2                                                                        | 3<br>nd                                                                                | nd<br>nd                                                                          | nd<br>nd                                                                                         | nd<br>1                                |
| Sod5 <sup>d</sup>  | 103-117                                                                                                                                                                        | AATPAAEHVGLDLAGK                                                                                                                                                                                                                                                                                                                             | 228 aa | 7  | 1                                                                              | nd                                                                                     | nd                                                                                | nd                                                                                               | nd                                     |
| Ssr1 <sup>d</sup>  | 41-54<br>64-79                                                                                                                                                                 | CGLNDLSCICTTK<br>EICPNGDADTAISAFK                                                                                                                                                                                                                                                                                                            | 234 aa | 13 | 1<br>nd                                                                        | nd<br>nd                                                                               | 2<br>nd                                                                           | 1<br>1                                                                                           | 3<br>1                                 |
| Sun41              | 204-218<br>219-238<br>249-258 [249-259]<br>259-264 [258-264]<br>266-274<br>275-309<br>368-373<br>376-394                                                                       | EGSYCSYACQSGMSK<br>TQWPEDQPSNGVSIIGLLCK<br>SNYLCEWGVK [SNYLCEWGVKK]<br>ANVVNK [KANVVNK]<br>LSETVAICR<br>TDYPGTENMVIPTVVGGGSTSVITVVDQSTYYTWR<br>DSLNFK<br>IVGESGTVSGSCSYANGK                                                                                                                                                                  | 418 aa | 29 | 3<br>nd<br>nd<br>3<br>3<br>nd<br>3<br>1                                        | 3<br>3<br>nd<br>nd<br>2<br>nd<br>3<br>nd                                               | 3<br>1<br>1<br>nd<br>nd<br>nd<br>1<br>nd                                          | 3<br>nd<br>nd<br>nd<br>nd<br>nd<br>nd<br>nd                                                      | 3<br>2<br>nd<br>nd<br>3<br>2<br>1<br>1 |
| Sur7               | 66-93<br>175-181<br>246-254                                                                                                                                                    | ADYSNLLGPAYPISPEDNFGTTADIPK<br>YAHIGAK<br>DEENTGGIR                                                                                                                                                                                                                                                                                          | 270 aa | 16 | 1<br>1<br>nd                                                                   | nd<br>nd<br>nd                                                                         | nd<br>nd<br>nd                                                                    | nd<br>nd<br>1                                                                                    | nd<br>nd<br>nd                         |

|                   |                   |                               |        |    |         |        |    |    |    |
|-------------------|-------------------|-------------------------------|--------|----|---------|--------|----|----|----|
| Tos1              | 22-36             | GCSFEGGNYCSETK                | 468 aa | 41 | nd      | nd     | nd | 1  | 1  |
|                   | 42-61             | GIGFSGSYMDVTNMDENTGK          |        |    | nd      | nd     | nd | 3  | 3  |
|                   | 62-85             | CTQQLYSFSGNLSPLDEELSVHFR      |        |    | nd      | 2      | 2  | nd | 1  |
|                   | 107-116           | QIDDQDCNVK                    |        |    | nd      | nd     | nd | 1  | nd |
|                   | 231-259           | DSYYTPGSTDNCFVFLNYHGGSGGVWSAK |        |    | 1       | 2      | nd | 1  | 2  |
|                   | 260-287           | FGNSLSYANADNSGGSSTPVPLEETIK   |        |    | 3       | 1      | 1  | 1  | nd |
|                   | 288-299           | SGEYIIFSGSK                   |        |    | 1       | 1      | 1  | nd | nd |
|                   | 300-310           | CGSSSDCGYYR                   |        |    | 3       | 1      | 2  | 3  | 2  |
|                   | 311-320 [310-320] | GTVAYHGFK [KGTVAYHGFK]        |        |    | 3       | 3      | 2  | nd | 1  |
|                   | 358-370           | TLQYGEATCSCWK                 |        |    | nd      | 2      | nd | nd | nd |
|                   | 371-388           | TGCGELDLFEVLSGGSNK            |        |    | 2       | 1      | nd | 2  | nd |
| Utr2 <sup>a</sup> | 137-142           | YLWYQK                        | 470 aa | 15 | nd      | nd     | nd | nd | 2  |
|                   | 245-253           | YDYPQTPSR                     |        |    | nd      | 1      | 2  | 1  | nd |
|                   | 254-268           | IQFSLWPGGDSSNAK               |        |    | nd      | nd     | 1  | nd | nd |
|                   | 269-286           | GTIEWAGGLINWVSEDIK            |        |    | nd      | nd     | 3  | nd | nd |
|                   | 288-296           | YGYYYAHIK                     |        |    | nd      | nd     | nd | nd | 1  |
|                   | 297-310           | EIYATAVDIPNDVK                |        |    | 3       | 2      | 3  | 3  | 1  |
| Xog1              | 39-54             | GGGHNVAWDYDNNVIR              | 438 aa | 53 | 3       | 2      | 2  | nd | 1  |
|                   | 108-119           | HWSTWITEQDFK                  |        |    | 2       | 3      | 3  | 1  | 1  |
|                   | 120-130           | QISNLGLNFVR                   |        |    | 2       | 1      | nd | nd | nd |
|                   | 168-189           | VWIDLHGAPGSQNGFDNSGLR         |        |    | nd      | 1      | nd | 2  | 1  |
|                   | 190-211           | DSYNFQNGDNTQVTLNVLNTIFK       |        |    | 1       | 1      | nd | nd | 1  |
|                   | 212-240           | YGGNEYSDVVIGIELLNEPLGPVNLNMDK |        |    | nd      | nd     | nd | nd | 1  |
|                   | 243-253           | QFFLDGYNSLR                   |        |    | 1       | nd     | nd | 1  | nd |
|                   | 304-320           | NINDHISVACNWGWDAK             |        |    | 1       | 2      | 3  | 1  | 2  |
|                   | 322-340           | ESHWNVAGEWSAALTDCAK           |        |    | 2       | nd     | 2  | nd | 2  |
|                   | 341-347           | WLVGNVNR                      |        |    | 2       | 1      | nd | 1  | nd |
|                   | 351-378           | YEGAYDNAPYIGSCQPLLDISQWSDEHK  |        |    | 1       | nd     | nd | nd | nd |
|                   | 405-429           | TENAPEWSFQTLTYNGLFPQVTDTR     |        |    | 1       | nd     | 3  | nd | 1  |
|                   | 430-438           | QFPNQCGFH                     |        |    | nd      | nd     | 1  | nd | nd |
|                   | Ywp1 <sup>a</sup> | 87-93                         |        |    | VINVPAR | 533 aa | 7  | nd | 2  |
| 94-110            |                   | NLYGAGAVPFFQVHLEK             | 2      | 1  | nd      |        |    | 1  | 1  |
| 329-339           |                   | VITVACDEHK                    | nd     | nd | nd      |        |    | 1  | 3  |

nd = not detected

average protein coverage % 16

<sup>a</sup> Independent biological replicate

<sup>b</sup> Peptide common to at least two members of the protein family

<sup>c</sup> Number of peptides per biological replicate found in three technical replicates

<sup>d</sup> GPI-wall protein

<sup>e</sup> Residues in parentheses are from the miscleaved peptide

<sup>f</sup> The sequence of the miscleaved peptide is in parentheses

**Proteins with predicted intracellular localization**

| Name                  | Residues    | Peptide             | R1 <sup>a</sup> | R2 | R3 | R4 | R5 |
|-----------------------|-------------|---------------------|-----------------|----|----|----|----|
| Ald5                  | 179 - 192   | LGPVLATGSTTVLK      | nd              | 1  | nd | nd | nd |
| Arf2                  | 128 - 142   | QDLPNAMNAAEITEK     | nd              | nd | nd | nd | 1  |
|                       | 143 - 149   | LGLHSIR             | nd              | 2  | nd | nd | nd |
| Arf3                  | 41 - 53     | TVPTVGFNVETVK       | nd              | nd | nd | nd | 1  |
| Asc1                  | 247 - 258   | YWLAAATTSQIK        | nd              | 1  | nd | nd | nd |
| Atc1                  | 1018 - 1035 | ISAPFDPEEYFQVWVPTTR | nd              | nd | nd | nd | 1  |
| Cdc42                 | 134 - 147   | LSPITQEQGEKLAQ      | nd              | nd | nd | 1  | nd |
| Cyp1                  | 81 - 88     | FADENFVK            | nd              | nd | nd | nd | 1  |
| Eno1                  | 134 - 142   | HIANISNAK           | nd              | 3  | nd | nd | nd |
|                       | 225 - 236   | EALDLIMDAIDK        | nd              | 1  | nd | nd | nd |
|                       | 266 - 273   | NPESDPSK            | nd              | nd | nd | nd | 1  |
|                       | 319 - 333   | IQIVGDDLTVTNPTR     | nd              | 1  | nd | nd | 2  |
| Fba1                  | 55 - 72     | APIILQTSQGGAAAYFAGK | nd              | 2  | nd | nd | nd |
|                       | 95 - 113    | AIAPTYGIPVVLHTDHCAK | nd              | 1  | nd | nd | nd |
|                       | 193 - 211   | DALYTSPETVFAVYESLHK | nd              | nd | 2  | nd | nd |
| Het1                  | 37 - 50     | LFDLLGSSAFTVVK      | nd              | 3  | nd | nd | nd |
| Kar2 <sup>b</sup>     | 205 - 216   | DAGTIAGLNVLK        | nd              | 1  | nd | nd | nd |
| Mnt1 <sup>c</sup>     | 259 - 270   | DYAFTISLPEYK        | nd              | nd | nd | nd | 1  |
| Orf19.1267            | 48 - 64     | FQELGEAYGILSNPESR   | nd              | nd | nd | 1  | nd |
| Orf19.2204.7.9 bis 19 |             | LVIVGDGACGK         | 1               | nd | nd | nd | nd |
| Orf19.251             | 22 - 37     | TGVFVVEALHPFEVFR    | nd              | 1  | nd | nd | nd |
|                       | 179 - 186   | KGNLLTIK            | nd              | 1  | nd | nd | nd |
|                       | 213 - 224   | IVTGVNPSQSAVK       | nd              | 3  | nd | nd | nd |
| Orf19.86              | 14 - 23     | GEPYPFEQLK          | nd              | 3  | nd | nd | nd |

|       |           |                                |    |    |    |    |    |
|-------|-----------|--------------------------------|----|----|----|----|----|
|       | 96 - 108  | IEVNGDNTDPVYK                  | nd | nd | nd | nd | 1  |
|       | 115 - 122 | SGVLGLTR                       | nd | 3  | nd | nd | nd |
| Pgi1  | 67 - 77   | EILDQLVTLAK                    | nd | nd | 1  | nd | nd |
| Pst3  | 50 - 80   | LLHAPAKPNYPIATNDTLTGDAYLFGIPTR | nd | nd | nd | 2  | nd |
|       | 148 - 176 | AFPLQTNLEEIHGGSPYGAGTFAGVDGSR  | nd | nd | nd | 1  | nd |
| Rdi1  | 31 - 41   | NLDAEDES LAK                   | nd | nd | nd | 1  | nd |
|       | 44 - 62   | ASLGLTADTKPYVPKPGDK            | 2  | 1  | 1  | nd | nd |
|       | 65 - 84   | VVVTELALEFPEQPD LQPIR          | nd | nd | nd | nd | 1  |
|       | 85 - 98   | INLESDGNTIVDK                  | nd | nd | nd | 1  | 3  |
|       | 108 - 115 | SIYQLVVK                       | 1  | 2  | nd | nd | nd |
|       | 128 - 133 | YLHSVK                         | nd | 1  | nd | nd | nd |
| Rga2  | 327 - 333 | SNSTSLR                        | nd | nd | nd | 2  | nd |
|       | 743 - 748 | LNEQLK                         | nd | nd | nd | 2  | nd |
| Rho1  | 56 - 72   | KVELALWDTAGQEDYDR              | nd | nd | nd | 3  | 3  |
|       | 127 - 136 | DDPHTIEALR                     | nd | nd | nd | 1  | nd |
| Sec14 | 35 - 41   | TTLDIR                         | nd | 1  | nd | nd | 3  |
|       | 106 - 113 | MYPTYHK                        | 1  | nd | 1  | nd | nd |
|       | 200 - 208 | IGQDYPER                       | nd | nd | 1  | nd | nd |
|       | 279 - 297 | DVGPWRDPEFIGPEGECPR            | nd | nd | nd | nd | 1  |
| Tdh3  | 234 - 247 | VPITDVSVDLTVR                  | nd | 2  | 1  | nd | nd |
| Tef1  | 272 - 288 | AGMVVTFAPAGVTTEVK              | nd | 1  | nd | nd | nd |
| Ykt6  | 72 - 96   | SEGISGHITDKDYVVRPAYTLINK       | nd | 1  | nd | nd | nd |
| Ynk1  | 88 - 104  | AILGATNPLQSAPGTIR              | nd | 2  | nd | nd | nd |

<sup>8</sup> Predicted to be ER- or Golgi-associated proteins
